# Supplementary material
Source: publisher site journal article supplement (https://www.dovepress.com/article/399886)
Supplement: Supplementary file 1 [file get_supplementary_file.php]

# Supplementary Figures

**Figure S1.**


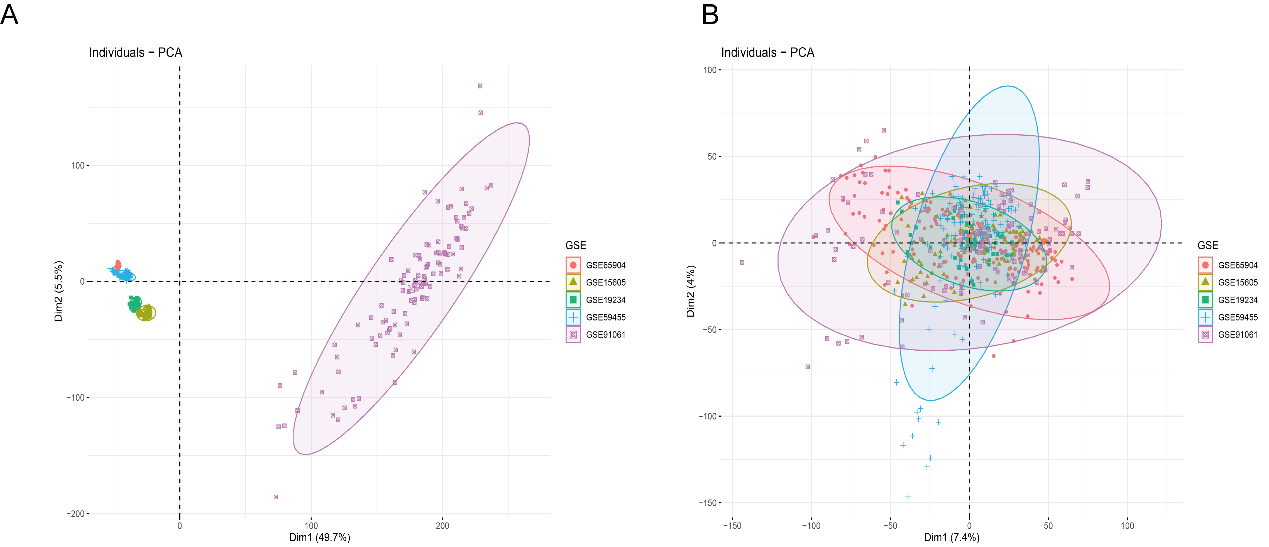


(A) PCA shows the gene expression distribution in 5 GC cohort samples (mGEO datasets) before batch effect correction.

(B) PCA shows the gene expression distribution in 5 GC cohort samples (mGEO datasets) after batch effect correction.

**Figure S2.**


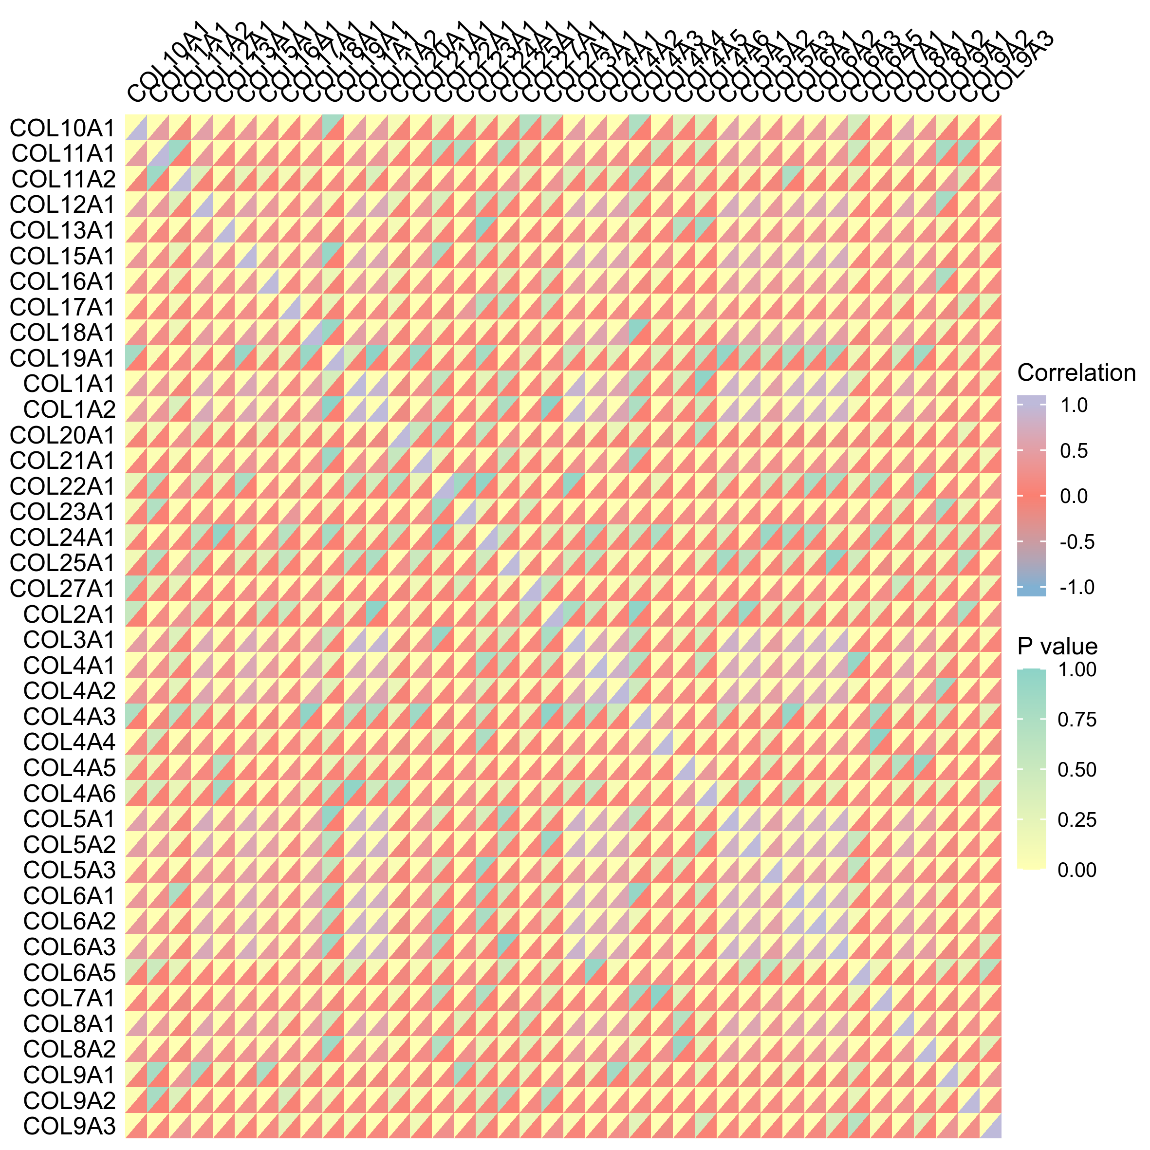


Correlation between expression levels of 44 collagen molecules, red represents positive correlation, blue represents negative correlation, and shades of yellow indicates the P values. [mGEO, Spearman method, n = 545].

**Figure S3.**


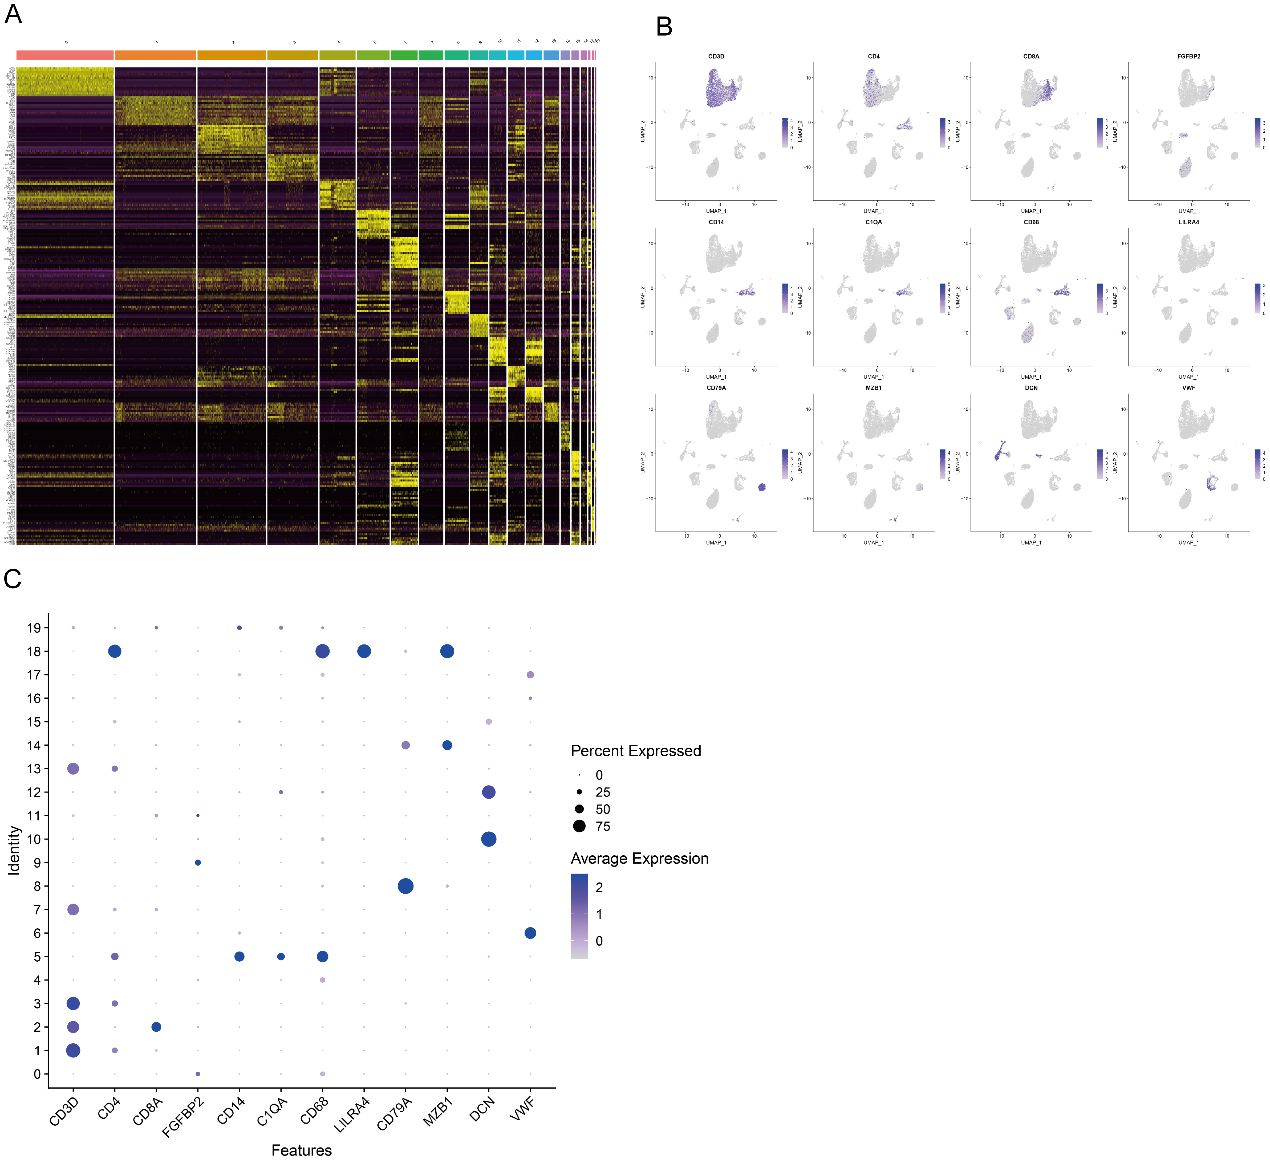


(A) Cell-cluster markers. The relative expression level of genes across cells is shown, sorted by cell cluster. Cell-cluster marker genes were identified in an unbiased fashion (Wilcoxon rank-sum test, FDR <0.01, and fold change >1.5) and only the top 15 gene are shown in the figure.

(B-C) Dot plot of marker genes from scRNA-seq used for cluster annotation.

**Figure S4.**


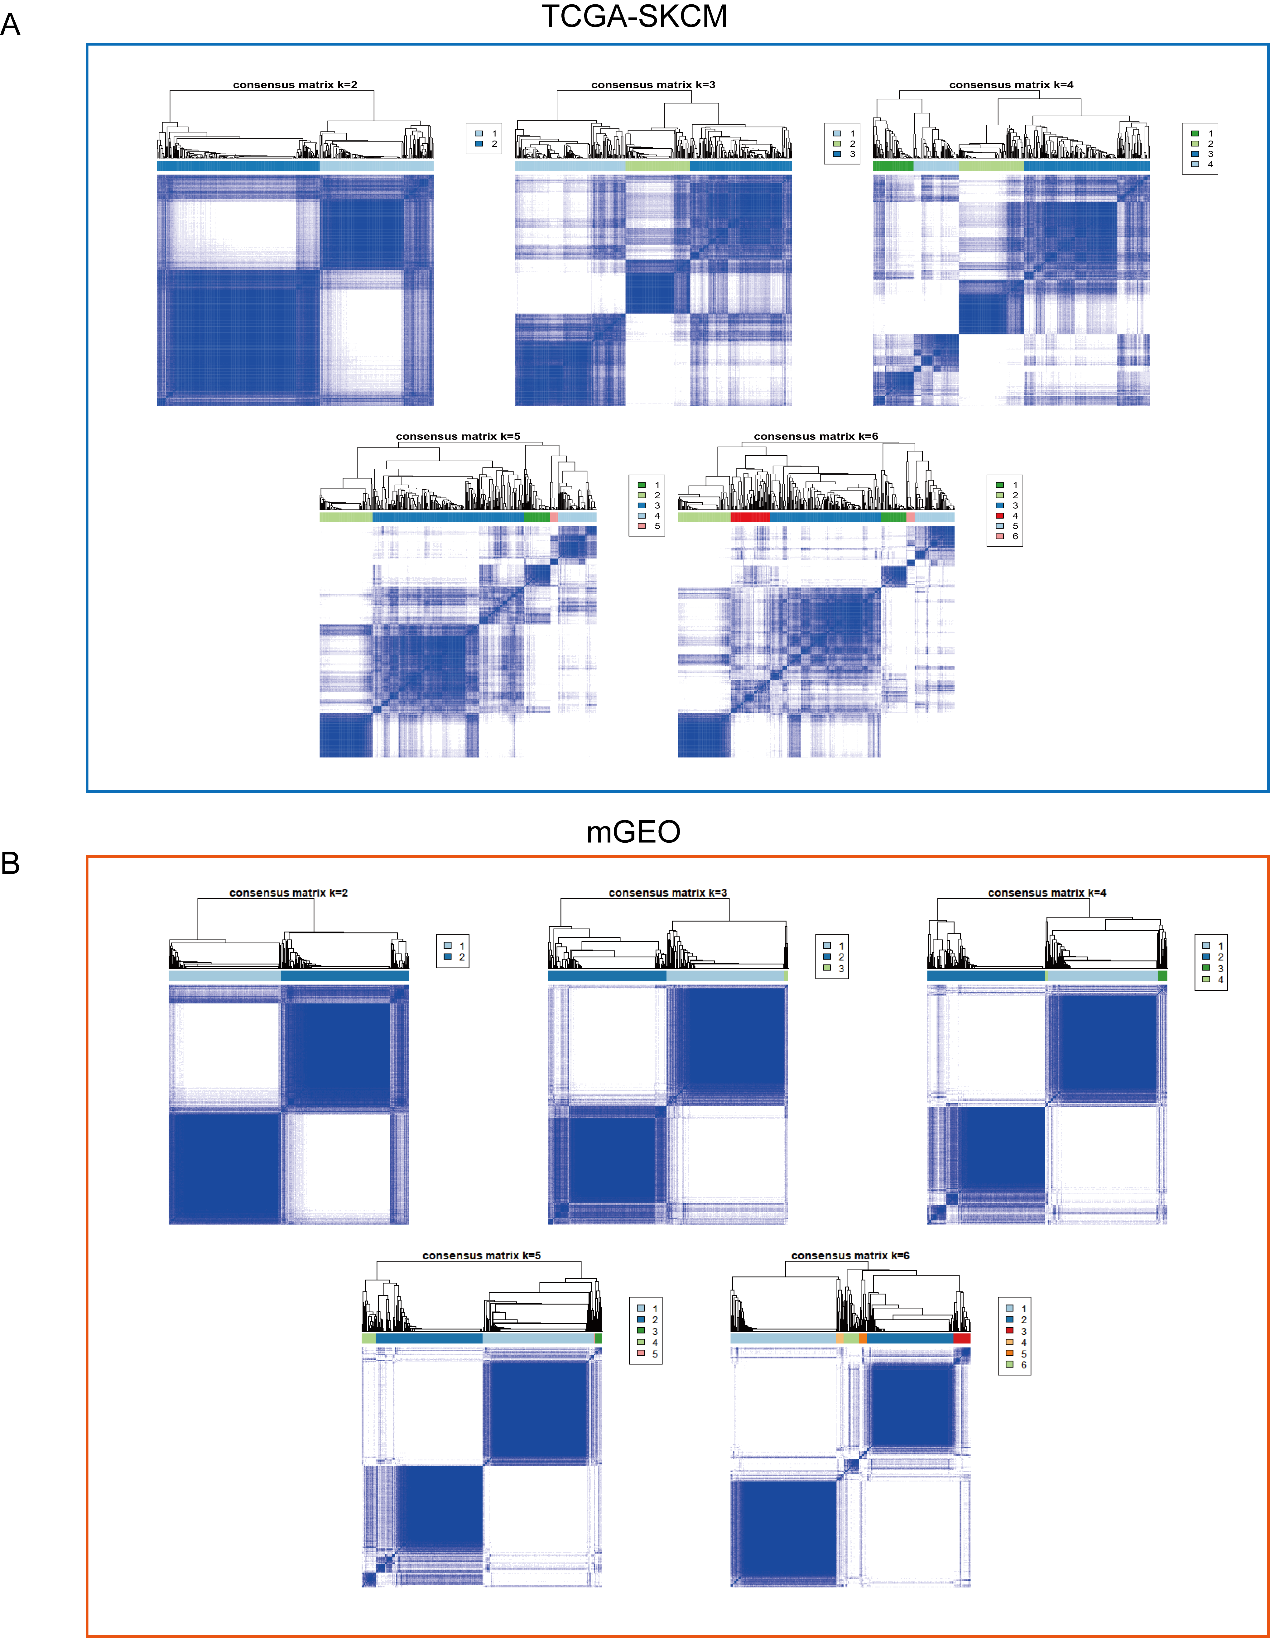


(A-B) The consensus score matrix of all samples when k = 2-6 based on TCGA-SKCM and mGEO.

**Figure S5.**


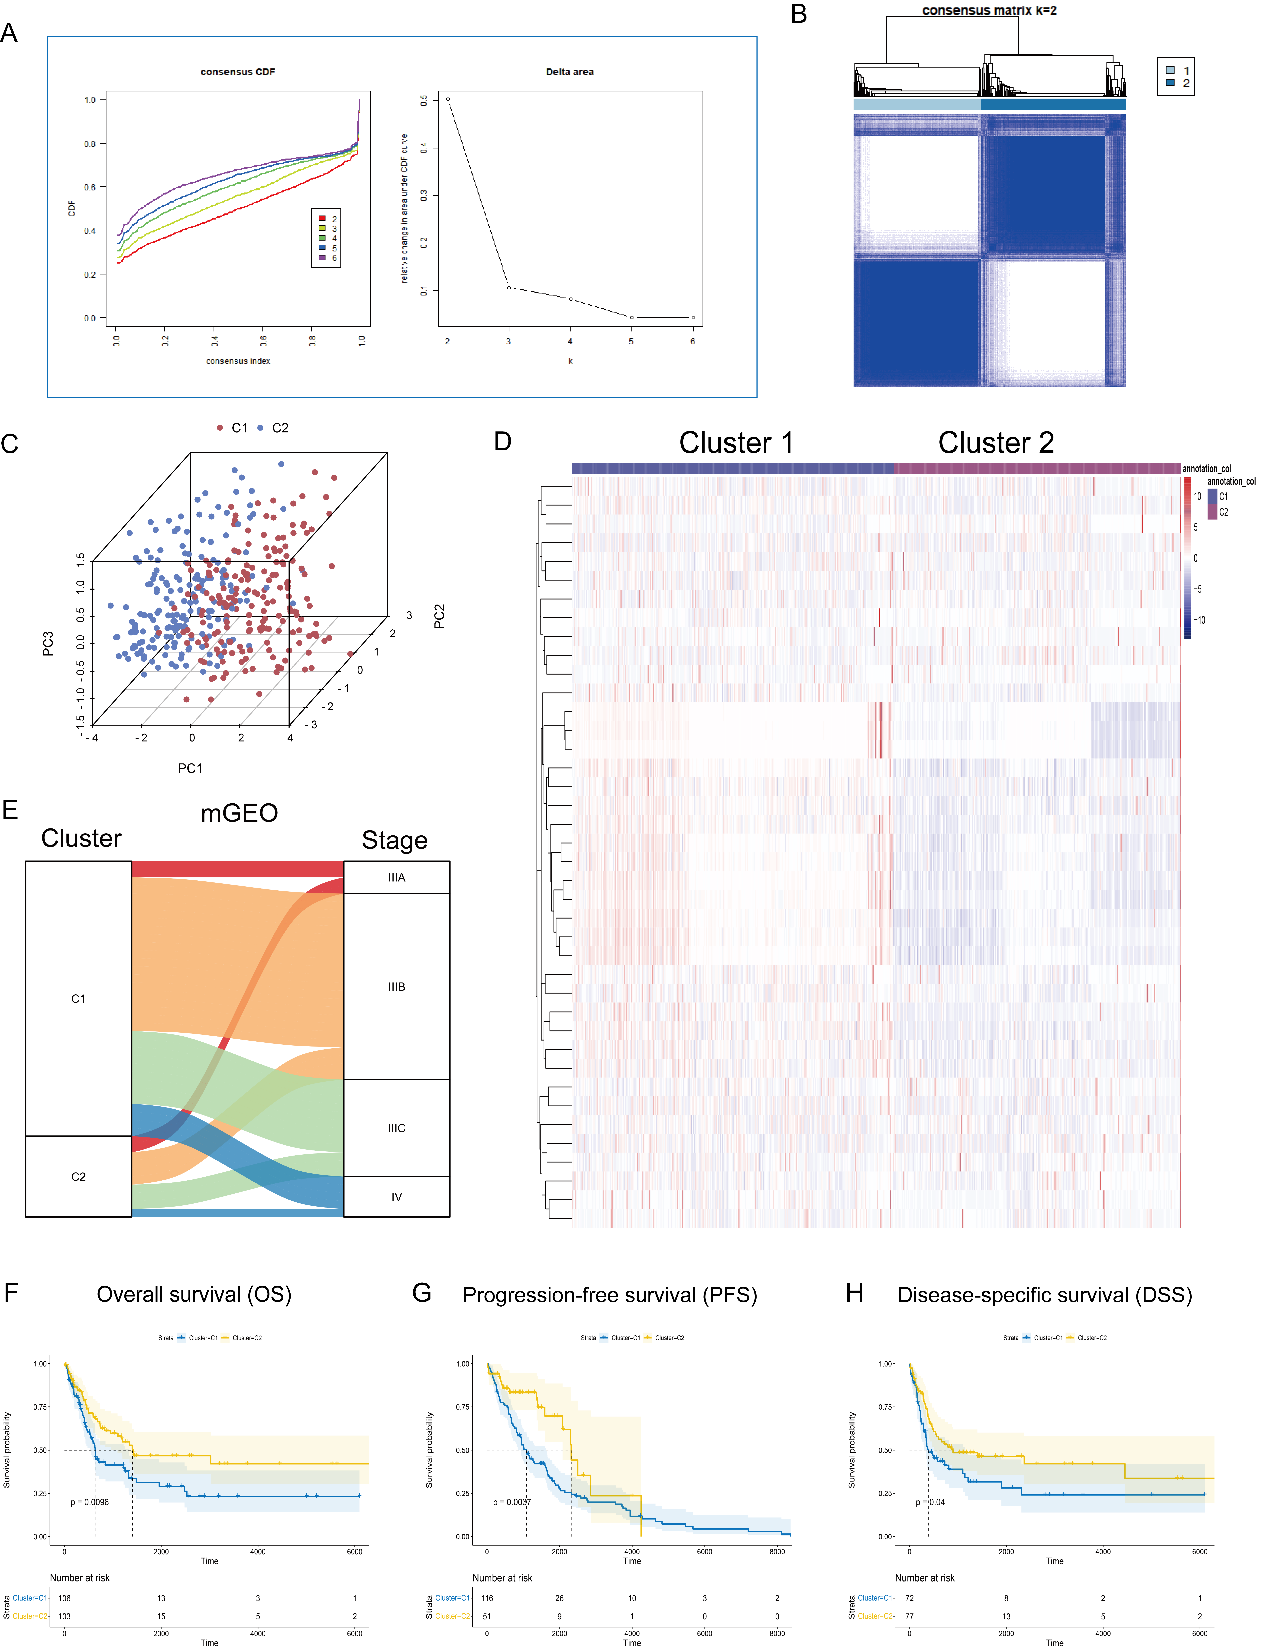


(A) Left: The cumulative distribution function (CDF) curves in consensus cluster analysis. CDF curves of consensus scores by different subtype numbers (k = 2, 3, 4, 5, and 6) were displayed. Right: Relative change in area under the CDF curve for k = 2–

(B) The consensus score matrix of all samples when k = 2. The higher the consensus score was, the more likely they were assigned to the same group based on mGEO (GSE65904; GSE15605; GSE19234; GSE59455; GSE91061)

(C) The Principal Component Analysis (PCA) distribution of mGEO samples by the expression profile of collagen molecules. Each point represents a single sample; different colors represent the C1 and C2 subtypes respectively.

(D) Expression distribution of 44 collagen molecules between two subtypes based on mGEO.

(E) The Sankey diagram fully demonstrated the association between Clinicopathological and subtype attributes based on mGEO.

(F-H) Survival analysis including Overall Survival (OS), Progression-Free Survival (PFS), and Disease-Specific Survival (DSS) based on 2 subtypes (mGEO, Logrank test, n = 545).

# Supplementary Table 1

| Antibodies and Reagents | Manufacturer, Country, Cat number | Concentration |
| --- | --- | --- |
| Nidogen 2 Polyclonal Antibody | Thermo Fisher Scientific, US, # PA5-62615 | IHC 1:200  IF 1:100 |
| Alpha-Smooth Muscle Actin Polyclonal Antibody | Invitrogen, USA, # PA5-117765 | IF 1:200 |
| CD8 Polyclonal Antibody | Thermo Fisher Scientific, US, # PA5-83066 | IHC 1:200  IF 1:200 |
| Cytokeratin 20 Recombinant Rabbit Monoclonal Antibody (CK) | Thermo Fisher Scientific, US, # MA5-31979 | IF 1:200 |
| HE staining kit | Beyotime Biotechnology, China, #C0105, |  |
| Goat Anti-Rabbit IgG H&L (HRP) | Abcam, Cambridge, UK, #ab205718 | IHC 1:2000 |
| Alexa Fluor 488 AffiniPure goat anti-mouse IgG (H+L) | FcMACS, China, #136908 | IF1:500 |
| Goat anti-mouse IgG (H+L) CoraLite594 | Proteintech, China, #SA00013-4 | IF 1:500 |
| Fluorescein (FITC) conjugated Affinipure Goat Anti-Rabbit IgG(H+L) | Proteintech, China, # SA00003-2 | IF 1:500 |
| 0.2% TritonX-100 | Proteintech, China, #61202011 |  |
| Nuclei were stained using 4',6-diamidino-2-phenylindole (DAPI) | Beyotime Biotechnology, China, # 091620210520 |  |
